# Supplementary material
Source: Springer Nature journal article supplement (https://www.springermedizin.de/resource/supplementary/13256_2011_2124_MOESM8_ESM.pdf/9649076)

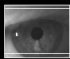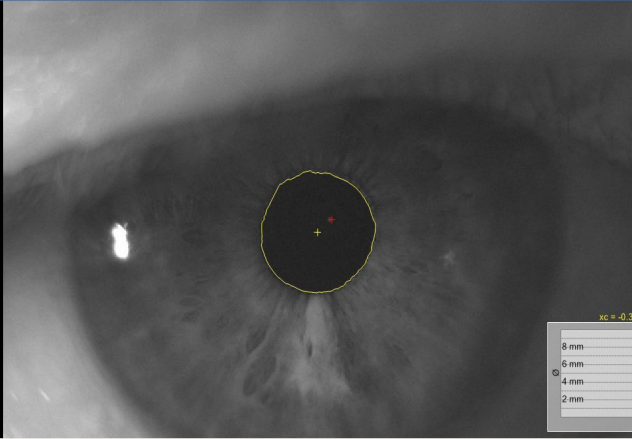

OD

$x_c = -0.32 \text{ mm}$ ,  $y_c = 0.26 \text{ mm}$ ,  $\varnothing = 2.44 \text{ mm}$

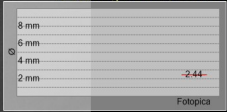

Fotopica

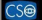

Supplement: MOESM8 [file 9649076]
